# Supplementary material for: Effect of magnification factor by Galilean loupes on working posture of dental students in simulated clinical procedures: associations between direct and observational measurements
Source: PeerJ. 2022 Mar 10;10:e13021. doi: 10.7717/peerj.13021 (PMC8918149; doi:10.7717/peerj.13021)
Supplement: Supplemental Information 1 [file peerj-10-13021-s001.xlsx]

## Sheet: EMG - Cavity Preparation
Right Sternocleidomastoid				Left Sternocleidomastoid				Right Descending Trapezius				Left Descending Trapezius				Right Ascending Trapezius				Right Ascending Trapezius
LOUPE	TOOTH	EMG		LOUPE	TOOTH	EMG		LOUPE	TOOTH	EMG		LOUPE	TOOTH	EMG		LOUPE	TOOTH	EMG		LOUPE	TOOTH	EMG
1	16	22.7536		1	16	5.1047		1	16	44.2571		1	16	90.5922		1	16	17.7678		1	16	13.982
1	16	21.3758		1	16	10.4382		1	16	59.7961		1	16	92.4155		1	16	22.2846		1	16	18.0433
1	16	13.8791		1	16	3.67572		1	16	43.812		1	16	98.1381		1	16	12.3129		1	16	14.3818
1	16	11.0704		1	16	3.52282		1	16	42.2248		1	16	100		1	16	12.2646		1	16	19.3809
1	16	12.573		1	16	0.859532		1	16	41.0234		1	16	75.4557		1	16	13.6636		1	16	12.297
1	16	10.9352		1	16	0.466803		1	16	39.1396		1	16	42.1458		1	16	16.2696		1	16	22.1257
1	16	9.67023		1	16	0.457075		1	16	50.0108		1	16	71.8142		1	16	20.6886		1	16	12.8918
1	16	8.27276		1	16	0.454448		1	16	59.8279		1	16	79.8672		1	16	22.3294		1	16	16.1733
1	16	15.3146		1	16	7.14918		1	16	48.8694		1	16	54.497		1	16	16.7656		1	16	21.7233
1	16	10.774		1	16	8.67476		1	16	46.4155		1	16	100		1	16	11.8463		1	16	9.45773
2	16	8.22669		2	16	6.9851		2	16	36.65		2	16	64.631		2	16	13.2963		2	16	17.3334
2	16	11.066		2	16	5.17279		2	16	41.5047		2	16	69.5961		2	16	10.5393		2	16	11.9548
2	16	20.3674		2	16	9.16017		2	16	57.6894		2	16	98.29		2	16	25.1349		2	16	17.2318
2	16	10.869		2	16	3.83382		2	16	44.3476		2	16	100		2	16	13.9542		2	16	14.7392
2	16	9.70934		2	16	0.514265		2	16	39.7953		2	16	69.8798		2	16	16.3442		2	16	9.86412
2	16	8.67618		2	16	0.463392		2	16	42.0397		2	16	67.9359		2	16	24.7488		2	16	18.0507
2	16	8.06099		2	16	0.453441		2	16	51.7527		2	16	83.0925		2	16	20.6962		2	16	10.3414
2	16	8.932		2	16	0.45305		2	16	95.0575		2	16	89.8118		2	16	23.6993		2	16	7.99814
2	16	12.8743		2	16	6.38446		2	16	40.6702		2	16	28.7697		2	16	27.4771		2	16	10.0072
2	16	13.9455		2	16	3.97151		2	16	35.2771		2	16	61.1102		2	16	14.3949		2	16	12.6873
3	16	9.04086		3	16	4.59132		3	16	28.4576		3	16	63.2082		3	16	12.2231		3	16	14.3177
3	16	8.05441		3	16	4.4311		3	16	36.195		3	16	70.0992		3	16	15.1913		3	16	16.8383
3	16	6.521		3	16	3.90968		3	16	37.1132		3	16	94.3229		3	16	15.3607		3	16	18.4713
3	16	7.98251		3	16	4.98456		3	16	44.5317		3	16	100		3	16	12.732		3	16	17.7354
3	16	8.37605		3	16	0.467473		3	16	33.3492		3	16	63.8324		3	16	16.8778		3	16	19.8474
3	16	9.04972		3	16	0.473902		3	16	44.2833		3	16	72.4396		3	16	14.5401		3	16	13.4534
3	16	10.4763		3	16	0.466299		3	16	56.6892		3	16	90.6346		3	16	16.9505		3	16	10.5405
3	16	22.7032		3	16	9.27115		3	16	50.0108		3	16	100		3	16	27.1953		3	16	14.7851
3	16	13.6477		3	16	10.9538		3	16	64.6576		3	16	100		3	16	24.1619		3	16	17.381
3	16	14.0625		3	16	6.79966		3	16	37.1842		3	16	54.3878		3	16	15.0631		3	16	15.3361
4	16	7.05302		4	16	5.31601		4	16	31.1332		4	16	57.2693		4	16	13.6117		4	16	12.6917
4	16	20.6118		4	16	9.43495		4	16	51.3399		4	16	82.4616		4	16	23.0172		4	16	23.2507
4	16	9.88225		4	16	5.85052		4	16	38.2839		4	16	100		4	16	11.683		4	16	18.5505
4	16	7.46682		4	16	4.31443		4	16	51.5413		4	16	100		4	16	14.8618		4	16	20.7035
4	16	9.97327		4	16	0.488661		4	16	60.3275		4	16	100		4	16	34.3867		4	16	13.3081
4	16	8.02289		4	16	0.459144		4	16	40.3048		4	16	65.2663		4	16	20.7923		4	16	14.6964
4	16	10.2282		4	16	0.452379		4	16	50.8597		4	16	75.414		4	16	27.946		4	16	8.96822
4	16	13.3599		4	16	9.68104		4	16	50.011		4	16	100		4	16	27.806		4	16	4.21003
4	16	14.0358		4	16	6.45032		4	16	36.8685		4	16	58.6377		4	16	16.8536		4	16	13.1829
4	16	13.101		4	16	9.33152		4	16	43.7556		4	16	100		4	16	13.6195		4	16	12.7707
1	26	13.8413		1	26	5.04085		1	26	55.9873		1	26	85.3236		1	26	15.3042		1	26	25.8772
1	26	9.61643		1	26	5.10721		1	26	61.1376		1	26	74.5002		1	26	11.7951		1	26	22.0672
1	26	7.65745		1	26	6.95793		1	26	54.8756		1	26	96.1762		1	26	9.88046		1	26	19.3895
1	26	8.99846		1	26	3.99695		1	26	52.5019		1	26	79.062		1	26	11.3928		1	26	27.0475
1	26	10.8745		1	26	0.821964		1	26	42.7142		1	26	43.4046		1	26	11.0123		1	26	16.3165
1	26	10.6324		1	26	0.46848		1	26	42.677		1	26	48.4771		1	26	14.3159		1	26	13.9597
1	26	8.14795		1	26	0.460262		1	26	64.8886		1	26	72.0819		1	26	15.7456		1	26	16.1222
1	26	7.9758		1	26	0.45182		1	26	59.8939		1	26	75.5894		1	26	11.4145		1	26	8.68429
1	26	13.8413		1	26	11.11		1	26	76.1516		1	26	84.4542		1	26	15.7628		1	26	22.2003
1	26	24.2693		1	26	15.7537		1	26	62.6261		1	26	77.8939		1	26	21.9046		1	26	21.9564
2	26	9.98757		2	26	4.33919		2	26	38.3584		2	26	42.2034		2	26	12.6764		2	26	29.9906
2	26	7.69466		2	26	4.44312		2	26	26.1969		2	26	31.8487		2	26	12.2307		2	26	21.1359
2	26	6.15872		2	26	3.56732		2	26	38.4974		2	26	43.87		2	26	14.6739		2	26	19.3895
2	26	12.3063		2	26	5.91011		2	26	56.4345		2	26	83.1523		2	26	10.8324		2	26	19.1042
2	26	9.24162		2	26	0.48022		2	26	38.0846		2	26	64.1285		2	26	14.3416		2	26	13.9022
2	26	9.55149		2	26	0.461659		2	26	44.3281		2	26	41.2453		2	26	14.838		2	26	19.1361
2	26	9.12618		2	26	0.458193		2	26	50.2531		2	26	68.6263		2	26	17.2098		2	26	11.5757
2	26	22.1821		2	26	8.96188		2	26	65.688		2	26	81.8476		2	26	15.293		2	26	15.4832
2	26	26.1242		2	26	10.3739		2	26	55.3385		2	26	55.1218		2	26	22.7854		2	26	20.1044
2	26	13.7874		2	26	4.43775		2	26	33.1864		2	26	66.3546		2	26	10.8251		2	26	10.8479
3	26	6.59264		3	26	4.06381		3	26	47.6607		3	26	66.8284		3	26	10.8543		3	26	19.5868
3	26	9.53542		3	26	4.96287		3	26	54.6433		3	26	85.7695		3	26	9.80415		3	26	22.619
3	26	6.5972		3	26	3.09661		3	26	50.7949		3	26	70.6361		3	26	12.585		3	26	29.0446
3	26	21.258		3	26	9.55598		3	26	62.9419		3	26	84.6178		3	26	22.6045		3	26	17.9091
3	26	8.69124		3	26	0.466691		3	26	36.5713		3	26	53.5399		3	26	17.33		3	26	26.6371
3	26	9.34782		3	26	0.465461		3	26	42.34		3	26	49.5001		3	26	15.6957		3	26	15.0476
3	26	9.24972		3	26	0.453106		3	26	43.2781		3	26	74.692		3	26	16.7066		3	26	12.1759
3	26	22.6278		3	26	9.15481		3	26	50.7965		3	26	97.0692		3	26	28.1477		3	26	16.6648
3	26	24.1107		3	26	6.62519		3	26	44.4622		3	26	92.6819		3	26	13.3084		3	26	15.5601
3	26	16.4464		3	26	7.93654		3	26	34.6125		3	26	37.7582		3	26	11.2706		3	26	15.581
4	26	9.30669		4	26	5.87489		4	26	36.3899		4	26	73.1674		4	26	10.2758		4	26	23.0921
4	26	18.9768		4	26	8.48373		4	26	56.6422		4	26	86.7746		4	26	16.9989		4	26	29.2757
4	26	10.3038		4	26	4.388		4	26	43.8306		4	26	100		4	26	10.7708		4	26	24.4886
4	26	8.84542		4	26	5.48272		4	26	47.7087		4	26	100		4	26	10.0311		4	26	22.2585
4	26	9.45795		4	26	0.479325		4	26	50.0614		4	26	84.4542		4	26	14.9107		4	26	12.0927
4	26	8.1158		4	26	0.459088		4	26	42.0966		4	26	63.9858		4	26	17.5669		4	26	13.5378
4	26	8.07492		4	26	0.456013		4	26	53.8699		4	26	76.6941		4	26	16.3882		4	26	9.64901
4	26	8.16833		4	26	0.45646		4	26	77.0047		4	26	82.6522		4	26	15.5276		4	26	9.68261
4	26	13.8413		4	26	7.65495		4	26	49.9226		4	26	84.4542		4	26	13.1395		4	26	12.6275
4	26	14.5379		4	26	10.2237		4	26	37.2099		4	26	48.0225		4	26	12.3702		4	26	14.2378
1	36	13.4751		1	36	4.83244		1	36	54.8948		1	36	49.4472		1	36	30.0488		1	36	18.1422
1	36	6.5953		1	36	3.7442		1	36	43.7769		1	36	35.7403		1	36	18.4372		1	36	19.3878
1	36	7.00618		1	36	3.21971		1	36	56.3023		1	36	48.7206		1	36	25.8663		1	36	13.3308
1	36	9.19137		1	36	4.78173		1	36	56.719		1	36	84.3173		1	36	41.7396		1	36	17.8957
1	36	11.7397		1	36	4.26753		1	36	49.1553		1	36	44.5839		1	36	21.4877		1	36	11.3941
1	36	8.40935		1	36	4.26753		1	36	57.9763		1	36	42.035		1	36	46.68		1	36	15.5417
1	36	8.73162		1	36	4.26753		1	36	65.1126		1	36	49.0777		1	36	17.3914		1	36	20.5539
1	36	8.49188		1	36	4.26753		1	36	53.5464		1	36	54.9609		1	36	17.2228		1	36	14.611
1	36	23.1518		1	36	7.06577		1	36	53.5464		1	36	54.6137		1	36	18.2399		1	36	19.8631
1	36	10.9309		1	36	10.9479		1	36	58.1699		1	36	27.8476		1	36	14.7058		1	36	21.8653
2	36	18.0832		2	36	3.50214		2	36	34.2312		2	36	31.7989		2	36	26.5037		2	36	28.8434
2	36	6.62834		2	36	4.6271		2	36	49.4144		2	36	40.0911		2	36	16.2602		2	36	22.6828
2	36	8.66226		2	36	3.59253		2	36	37.0657		2	36	46.198		2	36	24.3982		2	36	12.9348
2	36	7.86365		2	36	7.06733		2	36	41.3374		2	36	59.2145		2	36	29.271		2	36	25.0383
2	36	9.31656		2	36	4.26753		2	36	35.4961		2	36	43.1877		2	36	17.9271		2	36	19.81
2	36	10.0144		2	36	4.26753		2	36	47.6428		2	36	39.5397		2	36	28.3231		2	36	8.62603
2	36	10.4181		2	36	4.26753		2	36	54.098		2	36	48.1939		2	36	17.5384		2	36	14.1191
2	36	10.6619		2	36	4.26753		2	36	51.7406		2	36	48.3428		2	36	19.9515		2	36	14.0833
2	36	15.9038		2	36	4.20072		2	36	32.5549		2	36	66.9701		2	36	14.5752		2	36	13.8153
2	36	13.2768		2	36	4.87554		2	36	48.6189		2	36	59.6521		2	36	17.2149		2	36	16.1148
3	36	20.0918		3	36	8.93387		3	36	73.4637		3	36	55.3529		3	36	19.2194		3	36	15.5399
3	36	7.29656		3	36	5.62153		3	36	60.6765		3	36	37.6288		3	36	26.8348		3	36	18.1422
3	36	6.5334		3	36	3.60522		3	36	51.0257		3	36	64.2046		3	36	37.5107		3	36	26.0891
3	36	10.8017		3	36	7.47583		3	36	55.3771		3	36	57.8898		3	36	24.7603		3	36	11.5972
3	36	8.63593		3	36	4.26753		3	36	50.9504		3	36	42.0063		3	36	34.596		3	36	16.1034
3	36	18.9103		3	36	4.26753		3	36	43.7428		3	36	43.5423		3	36	16.9864		3	36	12.9629
3	36	7.93264		3	36	4.26753		3	36	49.8109		3	36	46.2843		3	36	14.0344		3	36	15.1204
3	36	7.93973		3	36	4.26753		3	36	83.2538		3	36	62.5683		3	36	23.8685		3	36	13.6392
3	36	20.6511		3	36	7.57299		3	36	43.9854		3	36	54.6137		3	36	14.9187		3	36	22.648
3	36	13.4751		3	36	14.2695		3	36	60.6304		3	36	79.9306		3	36	30.3071		3	36	20.2643
4	36	7.38542		4	36	4.43647		4	36	41.4055		4	36	31.2818		4	36	31.0477		4	36	18.1422
4	36	7.69479		4	36	5.24859		4	36	56.7859		4	36	46.4155		4	36	13.8065		4	36	30.2765
4	36	9.63023		4	36	5.32686		4	36	52.4133		4	36	71.039		4	36	30.6634		4	36	16.9296
4	36	9.76289		4	36	10.0574		4	36	50.262		4	36	60.7673		4	36	29.2009		4	36	14.5849
4	36	24.273		4	36	9.33052		4	36	59.8084		4	36	54.6137		4	36	23.9023		4	36	18.4252
4	36	8.73276		4	36	4.26753		4	36	42.5073		4	36	39.8154		4	36	16.2548		4	36	13.1943
4	36	10.2014		4	36	4.26753		4	36	55.9651		4	36	46.2067		4	36	23.4701		4	36	10.5023
4	36	7.95909		4	36	4.26753		4	36	61.4578		4	36	53.6699		4	36	25.0221		4	36	15.0697
4	36	27.9535		4	36	10.6863		4	36	54.9417		4	36	63.0761		4	36	22.572		4	36	15.0006
4	36	18.683		4	36	8.78427		4	36	39.1129		4	36	25.0502		4	36	16.9893		4	36	8.4992
1	46	14.1379		1	46	4.74271		1	46	77.6016		1	46	68.6677		1	46	23.7493		1	46	28.4935
1	46	7.34466		1	46	4.01014		1	46	60.3511		1	46	74.6239		1	46	15.8953		1	46	30.9262
1	46	14.1379		1	46	3.13904		1	46	49.3845		1	46	76.4475		1	46	17.8336		1	46	13.9724
1	46	10.4183		1	46	7.87275		1	46	66.4451		1	46	97.1608		1	46	52.8856		1	46	10.9109
1	46	10.5252		1	46	6.98583		1	46	36.2181		1	46	45.3777		1	46	40.0972		1	46	23.7755
1	46	7.87188		1	46	6.98583		1	46	50.5901		1	46	44.4394		1	46	33.8083		1	46	25.9822
1	46	22.9639		1	46	9.54804		1	46	61.1346		1	46	84.7685		1	46	27.6423		1	46	25.325
1	46	8.02251		1	46	6.98583		1	46	61.1346		1	46	66.216		1	46	18.0326		1	46	16.206
1	46	19.4394		1	46	6.66024		1	46	56.0673		1	46	18.1081		1	46	21.3784		1	46	22.9565
1	46	9.98782		1	46	11.5396		1	46	48.4286		1	46	40.122		1	46	13.8535		1	46	30.1689
2	46	9.76719		2	46	4.3705		2	46	50.6882		2	46	45.2152		2	46	30.4238		2	46	29.6349
2	46	7.79378		2	46	4.51166		2	46	43.7711		2	46	47.1765		2	46	29.8331		2	46	41.1904
2	46	24.7118		2	46	9.73705		2	46	63.6927		2	46	100		2	46	55.2026		2	46	29.9817
2	46	9.91339		2	46	6.46809		2	46	42.6809		2	46	73.0804		2	46	33.4665		2	46	22.6802
2	46	8.54922		2	46	6.98583		2	46	36.4785		2	46	36.7735		2	46	17.1494		2	46	20.8148
2	46	9.83327		2	46	6.98583		2	46	39.9731		2	46	38.1837		2	46	30.4334		2	46	24.7511
2	46	10.3352		2	46	6.98583		2	46	61.371		2	46	55.1054		2	46	23.0599		2	46	16.1549
2	46	9.86415		2	46	6.98583		2	46	39.4761		2	46	44.1325		2	46	28.6478		2	46	16.6942
2	46	16.2872		2	46	5.96579		2	46	59.4767		2	46	45.0976		2	46	26.6943		2	46	23.2971
2	46	15.6638		2	46	6.43013		2	46	46.8791		2	46	79.0153		2	46	14.7256		2	46	28.1401
3	46	14.1379		3	46	4.66093		3	46	68.6817		3	46	46.8432		3	46	35.2518		3	46	37.2858
3	46	7.37606		3	46	6.3526		3	46	63.2351		3	46	43.6476		3	46	25.8737		3	46	48.7785
3	46	12.826		3	46	12.8728		3	46	77.8775		3	46	97.6764		3	46	54.8652		3	46	24.4432
3	46	14.1379		3	46	3.92176		3	46	42.716		3	46	75.0989		3	46	37.194		3	46	16.1848
3	46	8.16251		3	46	6.98583		3	46	36.2092		3	46	51.4016		3	46	43.366		3	46	25.7331
3	46	8.08441		3	46	6.98583		3	46	41.6846		3	46	41.8686		3	46	20.3803		3	46	19.1834
3	46	8.36542		3	46	6.98583		3	46	51.5948		3	46	52.1892		3	46	15.5436		3	46	19.4367
3	46	7.6696		3	46	6.98583		3	46	71.3349		3	46	63.6529		3	46	14.5389		3	46	18.8206
3	46	12.826		3	46	14.5181		3	46	70.8899		3	46	64.3766		3	46	14.4362		3	46	17.9296
3	46	23.0194		3	46	8.39015		3	46	38.5013		3	46	51.1516		3	46	17.6897		3	46	24.9301
4	46	14.1379		4	46	4.02988		4	46	46.4498		4	46	34.9645		4	46	27.0255		4	46	29.0039
4	46	7.62783		4	46	7.45403		4	46	51.4288		4	46	37.1702		4	46	21.4342		4	46	25.6008
4	46	7.38175		4	46	6.78625		4	46	49.2667		4	46	76.269		4	46	55.2616		4	46	27.2866
4	46	14.1379		4	46	7.75921		4	46	57.3296		4	46	96.5912		4	46	61.6103		4	46	19.0211
4	46	8.22099		4	46	6.98583		4	46	40.11		4	46	64.3766		4	46	30.4125		4	46	30.3152
4	46	7.90631		4	46	6.98583		4	46	61.6002		4	46	46.8277		4	46	18.9534		4	46	13.1073
4	46	10.1839		4	46	6.98583		4	46	63.2821		4	46	59.377		4	46	19.3689		4	46	16.5355
4	46	8.52859		4	46	6.98583		4	46	90.2422		4	46	63.8812		4	46	19.302		4	46	19.0828
4	46	15.7241		4	46	5.65457		4	46	50.3165		4	46	64.3766		4	46	17.4227		4	46	22.7709
4	46	21.575		4	46	6.8185		4	46	41.1915		4	46	18.7162		4	46	16.8119		4	46	13.3282

## Sheet: EMG - Restoration
Right Sternocleidomastoid				Left Sternocleidomastoid				Right Descending Trapezius				Left Descending Trapezius				Right Ascending Trapezius				Right Ascending Trapezius
LOUPE	TOOTH	EMG		LOUPE	TOOTH	EMG		LOUPE	TOOTH	EMG		LOUPE	TOOTH	EMG		LOUPE	TOOTH	EMG		LOUPE	TOOTH	EMG
1	16	4.2131		1	16	4.33272		1	16	27.4475		1	16	26.9725		1	16	11.4845		1	16	19.7479
1	16	3.68835		1	16	2.50383		1	16	33.5143		1	16	30.0855		1	16	8.88909		1	16	15.5888
1	16	3.37116		1	16	2.61037		1	16	36.9942		1	16	35.6441		1	16	7.29926		1	16	15.4205
1	16	4.39749		1	16	1.9773		1	16	27.1646		1	16	27.0656		1	16	28.23		1	16	10.4684
1	16	6.82537		1	16	3.84999		1	16	33.3391		1	16	29.5856		1	16	16.2155		1	16	23.3262
1	16	4.10978		1	16	2.98794		1	16	33.533		1	16	25.4859		1	16	19.2563		1	16	23.3281
1	16	3.62461		1	16	2.02608		1	16	36.6878		1	16	37.7382		1	16	14.8868		1	16	22.7591
1	16	2.86112		1	16	1.95294		1	16	42.0405		1	16	39.7013		1	16	13.058		1	16	18.6624
1	16	2.31083		1	16	2.15258		1	16	46.4325		1	16	33.5883		1	16	9.87924		1	16	16.3336
1	16	2.78633		1	16	1.61723		1	16	35.6891		1	16	30.1121		1	16	8.79094		1	16	26.6649
2	16	1.07172		2	16	0.473076		2	16	29.4361		2	16	1.8803		2	16	14.6875		2	16	14.0391
2	16	4.6122		2	16	4.22665		2	16	37.1887		2	16	38.9792		2	16	10.1986		2	16	17.7761
2	16	3.03123		2	16	2.88736		2	16	51.2096		2	16	32.8707		2	16	13.9478		2	16	11.2001
2	16	5.31166		2	16	2.5192		2	16	32.8879		2	16	56.8755		2	16	12.6875		2	16	16.0965
2	16	7.46486		2	16	2.18901		2	16	35.8074		2	16	27.5679		2	16	18.1578		2	16	20.5201
2	16	6.10925		2	16	2.92982		2	16	37.5875		2	16	33.249		2	16	20.2984		2	16	17.9889
2	16	4.23244		2	16	1.57013		2	16	37.3015		2	16	34.8466		2	16	17.8098		2	16	16.8689
2	16	6.34063		2	16	3.1669		2	16	49.4808		2	16	24.2769		2	16	25.2085		2	16	16.0064
2	16	3.73928		2	16	1.67142		2	16	39.1014		2	16	24.0381		2	16	15.7684		2	16	15.9019
2	16	3.83598		2	16	1.56468		2	16	31.4671		2	16	23.1256		2	16	14.6721		2	16	17.3388
3	16	0.661644		3	16	0.293262		3	16	29.4361		3	16	25.4204		3	16	14.6875		3	16	14.0391
3	16	3.97518		3	16	4.4864		3	16	36.55		3	16	26.9678		3	16	13.0768		3	16	12.5511
3	16	5.83892		3	16	3.89349		3	16	52.9246		3	16	32.034		3	16	19.4933		3	16	11.039
3	16	4.54758		3	16	2.57422		3	16	27.6337		3	16	21.0821		3	16	9.70652		3	16	13.403
3	16	5.01319		3	16	2.19197		3	16	39.4708		3	16	24.7438		3	16	16.1718		3	16	19.3589
3	16	3.65594		3	16	1.95098		3	16	29.8493		3	16	25.7786		3	16	38.3454		3	16	12.6838
3	16	2.81036		3	16	1.41915		3	16	38.6035		3	16	27.0134		3	16	19.9994		3	16	14.8443
3	16	6.34377		3	16	3.11001		3	16	37.443		3	16	25.8209		3	16	20.746		3	16	14.5305
3	16	6.71171		3	16	4.43221		3	16	41.6382		3	16	31.9813		3	16	20.1936		3	16	13.0472
3	16	2.66911		3	16	1.40458		3	16	38.6931		3	16	20.9604		3	16	19.3187		3	16	20.9207
4	16	0.546519		4	16	0.266882		4	16	29.4361		4	16	25.4204		4	16	14.6875		4	16	14.0391
4	16	4.20895		4	16	2.80519		4	16	34.9382		4	16	26.7608		4	16	16.6458		4	16	9.78712
4	16	3.90906		4	16	4.4087		4	16	44.5128		4	16	31.3185		4	16	14.0398		4	16	10.7039
4	16	6.75422		4	16	2.21811		4	16	32.5801		4	16	25.609		4	16	10.5226		4	16	19.8849
4	16	3.05314		4	16	1.82504		4	16	45.593		4	16	25.0633		4	16	19.0274		4	16	14.688
4	16	3.48436		4	16	2.54164		4	16	38.6118		4	16	32.3874		4	16	18.7755		4	16	19.6869
4	16	2.53865		4	16	1.41761		4	16	41.5852		4	16	20.8638		4	16	19.4522		4	16	12.4799
4	16	3.06834		4	16	2.40974		4	16	41.7185		4	16	21.6167		4	16	16.6038		4	16	12.7056
4	16	7.21832		4	16	3.39005		4	16	44.1578		4	16	23.9928		4	16	24.4723		4	16	14.9304
4	16	3.16194		4	16	1.56931		4	16	31.3801		4	16	19.8705		4	16	13.3786		4	16	15.7182
1	26	3.54144		1	26	3.50041		1	26	25.1594		1	26	27.4298		1	26	11.1602		1	26	21.5078
1	26	6.0419		1	26	3.32229		1	26	35.5584		1	26	34.4356		1	26	8.88909		1	26	15.5888
1	26	7.32453		1	26	4.89378		1	26	36.9126		1	26	31.58		1	26	8.65246		1	26	14.4269
1	26	4.19534		1	26	2.18588		1	26	28.5741		1	26	27.0405		1	26	23.3333		1	26	9.56429
1	26	3.31023		1	26	2.3401		1	26	33.1039		1	26	30.3697		1	26	13.0118		1	26	11.9481
1	26	4.16695		1	26	2.72825		1	26	33.2333		1	26	38.7001		1	26	13.3089		1	26	17.3417
1	26	6.0842		1	26	1.90561		1	26	33.7963		1	26	35.5624		1	26	14.4629		1	26	20.3059
1	26	3.03148		1	26	1.87343		1	26	35.2443		1	26	32.708		1	26	7.75947		1	26	15.5499
1	26	2.78645		1	26	1.93346		1	26	41.2265		1	26	30.4095		1	26	11.4413		1	26	16.0189
1	26	3.2413		1	26	1.65148		1	26	37.9542		1	26	30.331		1	26	11.7787		1	26	20.5675
2	26	0.939761		2	26	0.421379		2	26	2.21262		2	26	25.4204		2	26	14.6875		2	26	14.0391
2	26	10.1465		2	26	4.51036		2	26	37.3285		2	26	42.407		2	26	12.5807		2	26	25.3412
2	26	3.13283		2	26	2.99515		2	26	45.8802		2	26	31.9054		2	26	18.2643		2	26	8.52881
2	26	5.07207		2	26	2.56548		2	26	28.8081		2	26	44.5405		2	26	10.7767		2	26	9.67256
2	26	3.35085		2	26	1.98255		2	26	35.4752		2	26	28.0153		2	26	15.1003		2	26	13.621
2	26	3.31496		2	26	2.91713		2	26	33.6937		2	26	32.469		2	26	16.9711		2	26	14.1221
2	26	3.07073		2	26	1.50613		2	26	37.7264		2	26	30.3775		2	26	15.7203		2	26	16.6308
2	26	3.38741		2	26	2.36746		2	26	29.4361		2	26	23.0438		2	26	13.5393		2	26	16.8338
2	26	2.79855		2	26	1.46376		2	26	35.6393		2	26	26.5485		2	26	14.6555		2	26	14.7066
2	26	2.91276		2	26	1.57495		2	26	31.5919		2	26	22.6268		2	26	13.4603		2	26	17.2984
3	26	0.471346		3	26	0.213603		3	26	29.4361		3	26	25.4204		3	26	14.6875		3	26	14.0391
3	26	3.73224		3	26	4.24804		3	26	36.8507		3	26	28.8082		3	26	8.27236		3	26	8.51722
3	26	3.57863		3	26	4.07861		3	26	29.4361		3	26	37.5904		3	26	6.3873		3	26	15.3012
3	26	4.41889		3	26	3.31816		3	26	25.8574		3	26	46.3424		3	26	8.58808		3	26	13.7831
3	26	7.8445		3	26	4.29138		3	26	37.1031		3	26	25.7377		3	26	14.6283		3	26	20.3087
3	26	3.38683		3	26	2.53564		3	26	31.9045		3	26	27.3913		3	26	33.047		3	26	25.0922
3	26	2.73678		3	26	1.6026		3	26	40.772		3	26	28.5344		3	26	14.3643		3	26	23.568
3	26	2.56596		3	26	2.11769		3	26	38.7259		3	26	22.9456		3	26	17.1563		3	26	11.5543
3	26	6.55195		3	26	4.8411		3	26	37.3289		3	26	28.3068		3	26	16.5619		3	26	12.8992
3	26	6.22106		3	26	2.95918		3	26	35.4517		3	26	24.6033		3	26	11.6879		3	26	16.4652
4	26	0.493459		4	26	0.237283		4	26	29.4361		4	26	25.4204		4	26	14.6875		4	26	14.0391
4	26	4.30496		4	26	11.5668		4	26	34.1071		4	26	22.9702		4	26	8.7066		4	26	9.40935
4	26	3.59928		4	26	3.66096		4	26	40.2752		4	26	29.323		4	26	12.9893		4	26	9.55535
4	26	5.10281		4	26	3.1238		4	26	29.7452		4	26	23.4185		4	26	13.9308		4	26	16.6203
4	26	6.05819		4	26	3.21906		4	26	30.4579		4	26	20.591		4	26	16.4621		4	26	23.4927
4	26	5.91614		4	26	2.89566		4	26	37.2111		4	26	31.45		4	26	17.584		4	26	15.0018
4	26	2.53509		4	26	1.56909		4	26	43.0165		4	26	23.3453		4	26	14.1317		4	26	13.383
4	26	5.51038		4	26	3.10755		4	26	35.1168		4	26	28.0566		4	26	11.9085		4	26	14.8165
4	26	6.85557		4	26	3.17627		4	26	37.4295		4	26	26.7092		4	26	16.941		4	26	14.6082
4	26	6.7097		4	26	2.91703		4	26	28.8511		4	26	21.0268		4	26	18.7755		4	26	23.5309
1	36	0.310783		1	36	2.70378		1	36	29.4361		1	36	25.4204		1	36	14.6875		1	36	14.0391
1	36	4.26436		1	36	2.45801		1	36	26.1107		1	36	25.7672		1	36	13.9869		1	36	9.98378
1	36	3.06901		1	36	3.02296		1	36	26.7026		1	36	27.662		1	36	12.0791		1	36	8.81635
1	36	6.05623		1	36	2.98947		1	36	24.5652		1	36	22.2302		1	36	13.0707		1	36	17.2556
1	36	3.84272		1	36	2.73551		1	36	26.7881		1	36	25.029		1	36	11.3948		1	36	14.0391
1	36	6.46718		1	36	3.70951		1	36	30.4274		1	36	33.6759		1	36	26.3718		1	36	14.7959
1	36	2.86363		1	36	1.87412		1	36	30.5594		1	36	24.6254		1	36	23.6167		1	36	16.6344
1	36	3.25185		1	36	1.90844		1	36	32.8362		1	36	30.2377		1	36	14.7966		1	36	14.7314
1	36	2.9873		1	36	2.06931		1	36	31.1867		1	36	25.4137		1	36	23.3272		1	36	9.80286
1	36	2.79805		1	36	2.25839		1	36	26.5311		1	36	25.7108		1	36	22.6771		1	36	10.9333
2	36	0.467242		2	36	2.70378		2	36	29.4361		2	36	25.4204		2	36	14.6875		2	36	14.0391
2	36	4.73239		2	36	3.23703		2	36	24.7224		2	36	24.0285		2	36	23.0428		2	36	11.7016
2	36	3.23405		2	36	2.98569		2	36	24.2139		2	36	29.6634		2	36	10.1452		2	36	10.2832
2	36	4.30496		2	36	3.34954		2	36	21.4545		2	36	24.0955		2	36	16.0771		2	36	14.0391
2	36	3.4563		2	36	2.54035		2	36	23.773		2	36	22.9951		2	36	13.2257		2	36	21.9475
2	36	4.31784		2	36	2.88403		2	36	23.2947		2	36	26.8622		2	36	20.372		2	36	14.1886
2	36	2.70089		2	36	1.88277		2	36	27.4335		2	36	24.4771		2	36	26.9909		2	36	13.1065
2	36	2.84948		2	36	2.0269		2	36	25.1402		2	36	22.6485		2	36	24.8875		2	36	10.4893
2	36	2.53501		2	36	1.77161		2	36	26.1418		2	36	23.5366		2	36	17.1718		2	36	11.7626
2	36	3.19134		2	36	1.96012		2	36	26.3486		2	36	21.7407		2	36	21.9624		2	36	15.2023
3	36	1.36211		3	36	0.602887		3	36	29.4361		3	36	25.4204		3	36	14.6875		3	36	14.0391
3	36	4.30205		3	36	2.70378		3	36	26.3207		3	36	26.669		3	36	12.1011		3	36	10.8543
3	36	3.36656		3	36	3.44611		3	36	29.4175		3	36	24.6461		3	36	12.2796		3	36	8.55479
3	36	4.04123		3	36	2.89738		3	36	23.6291		3	36	20.3059		3	36	10.227		3	36	14.7259
3	36	4.30496		3	36	2.73772		3	36	26.0155		3	36	23.9009		3	36	14.1028		3	36	14.0391
3	36	3.66415		3	36	1.90947		3	36	25.4763		3	36	24.797		3	36	17.6722		3	36	15.285
3	36	5.88549		3	36	2.70378		3	36	32.4558		3	36	28.1414		3	36	20.124		3	36	15.5605
3	36	3.02315		3	36	2.2831		3	36	30.7024		3	36	22.5159		3	36	24.5872		3	36	12.5246
3	36	2.67815		3	36	1.72736		3	36	28.5957		3	36	19.7869		3	36	22.9685		3	36	12.9298
3	36	5.87003		3	36	2.87811		3	36	28.0066		3	36	24.269		3	36	16.7999		3	36	14.044
4	36	0.457861		4	36	2.70378		4	36	29.4361		4	36	25.4204		4	36	14.6875		4	36	14.0391
4	36	3.21939		4	36	2.70378		4	36	22.7926		4	36	23.0324		4	36	13.2106		4	36	8.46596
4	36	4.65203		4	36	2.70378		4	36	24.3321		4	36	26.9945		4	36	11.6463		4	36	10.1393
4	36	5.03903		4	36	2.89899		4	36	19.6562		4	36	18.4997		4	36	10.8608		4	36	5.33743
4	36	4.30496		4	36	2.70378		4	36	21.6946		4	36	19.3542		4	36	19.8249		4	36	28.5325
4	36	2.97051		4	36	2.82373		4	36	27.0112		4	36	25.8621		4	36	22.8236		4	36	12.9998
4	36	2.43337		4	36	2.00542		4	36	27.3408		4	36	23.0426		4	36	22.8388		4	36	13.0306
4	36	2.77875		4	36	2.29959		4	36	30.7912		4	36	25.0972		4	36	16.9468		4	36	12.4951
4	36	6.06351		4	36	2.77631		4	36	30.0913		4	36	22.9684		4	36	23.4282		4	36	11.626
4	36	2.99099		4	36	1.72338		4	36	24.7693		4	36	22.1514		4	36	14.3294		4	36	13.6129
1	46	4.30496		1	46	2.70378		1	46	29.4361		1	46	25.4204		1	46	14.6875		1	46	14.0391
1	46	4.78805		1	46	3.00418		1	46	22.8292		1	46	25.8144		1	46	15.6625		1	46	11.3641
1	46	3.52708		1	46	3.03035		1	46	24.0094		1	46	28.3574		1	46	12.0152		1	46	8.72756
1	46	8.7758		1	46	3.12274		1	46	22.6181		1	46	25.4204		1	46	12.5605		1	46	14.6948
1	46	4.85904		1	46	2.76598		1	46	22.3247		1	46	25.9681		1	46	9.99692		1	46	18.6711
1	46	3.7923		1	46	2.79687		1	46	25.679		1	46	30.2172		1	46	15.0913		1	46	13.2966
1	46	3.31396		1	46	1.84077		1	46	35.9715		1	46	27.8808		1	46	15.6012		1	46	19.2361
1	46	3.42577		1	46	2.41127		1	46	32.3766		1	46	27.251		1	46	11.8928		1	46	9.22449
1	46	5.60364		1	46	3.09095		1	46	33.9958		1	46	25.5666		1	46	18.9741		1	46	12.3521
1	46	3.34093		1	46	1.91386		1	46	25.2224		1	46	28.1727		1	46	15.7817		1	46	15.2776
2	46	4.30496		2	46	0.233745		2	46	29.4361		2	46	25.4204		2	46	14.6875		2	46	14.0391
2	46	6.24208		2	46	3.55825		2	46	26.6132		2	46	23.6979		2	46	16.9485		2	46	14.4111
2	46	7.43488		2	46	2.70378		2	46	26.6115		2	46	29.8371		2	46	14.5318		2	46	10.0624
2	46	4.93932		2	46	2.19119		2	46	21.2015		2	46	23.2412		2	46	17.7932		2	46	11.4124
2	46	3.84934		2	46	2.48532		2	46	23.916		2	46	19.6766		2	46	13.6194		2	46	16.7583
2	46	3.84335		2	46	1.9316		2	46	23.2947		2	46	28.5432		2	46	18.0897		2	46	16.8972
2	46	2.77552		2	46	1.34694		2	46	29.522		2	46	25.5941		2	46	17.3476		2	46	18.2048
2	46	4.65215		2	46	4.37171		2	46	25.851		2	46	26.786		2	46	13.416		2	46	13.4936
2	46	3.24519		2	46	1.47271		2	46	29.4361		2	46	23.181		2	46	18.8918		2	46	13.6381
2	46	3.25817		2	46	1.54876		2	46	27.781		2	46	21.5907		2	46	19.8763		2	46	22.4093
3	46	4.30496		3	46	0.212523		3	46	29.4361		3	46	25.4204		3	46	14.6875		3	46	14.0391
3	46	3.67177		3	46	3.29582		3	46	22.3507		3	46	23.0502		3	46	10.3365		3	46	8.63493
3	46	4.47614		3	46	3.58986		3	46	25.1678		3	46	26.2117		3	46	9.12539		3	46	11.4315
3	46	4.97642		3	46	2.52477		3	46	21.3337		3	46	42.0856		3	46	15.9487		3	46	12.8579
3	46	4.28848		3	46	2.4714		3	46	21.8205		3	46	22.7374		3	46	15.0386		3	46	13.4253
3	46	4.12092		3	46	5.31114		3	46	28.4625		3	46	28.263		3	46	18.8746		3	46	13.5187
3	46	2.37679		3	46	1.49732		3	46	23.7643		3	46	25.3934		3	46	16.709		3	46	14.2216
3	46	2.48773		3	46	2.34162		3	46	25.0964		3	46	21.6725		3	46	12.3506		3	46	12.4044
3	46	3.07889		3	46	1.75207		3	46	24.9068		3	46	25.5843		3	46	16.9875		3	46	10.6395
3	46	3.25591		3	46	1.76588		3	46	25.4386		3	46	20.1883		3	46	10.4617		3	46	12.1951
4	46	4.43032		4	46	1.96941		4	46	29.4361		4	46	25.4204		4	46	4.97418		4	46	5.29077
4	46	3.34683		4	46	3.51912		4	46	24.5445		4	46	25.858		4	46	13.4059		4	46	14.9757
4	46	3.61117		4	46	3.78261		4	46	25.3416		4	46	27.8032		4	46	10.1595		4	46	10.7178
4	46	4.1324		4	46	2.31666		4	46	22.9447		4	46	22.1473		4	46	11.6345		4	46	12.545
4	46	5.92167		4	46	3.20028		4	46	25.7824		4	46	21.6725		4	46	18.4576		4	46	18.0201
4	46	3.71411		4	46	1.88543		4	46	25.3389		4	46	26.3195		4	46	15.2714		4	46	16.6039
4	46	2.78595		4	46	2.41132		4	46	20.7029		4	46	25.1144		4	46	8.50266		4	46	22.2441
4	46	2.42516		4	46	2.30359		4	46	23.6544		4	46	23.1022		4	46	15.1059		4	46	14.1996
4	46	2.86464		4	46	1.76381		4	46	26.9949		4	46	21.3967		4	46	18.4438		4	46	9.03253
4	46	3.15013		4	46	1.71381		4	46	26.5614		4	46	21.6185		4	46	13.9247		4	46	19.364

## Sheet: Neck Angulation - Cavity Prep.
LOUPE	TOOTH	ANGULATION
1	16	53.1
1	16	53.5
1	16	41.1
1	16	44.5
1	16	48
1	16	52.7
1	16	53.6
1	16	53.3
1	16	51.9
1	16	41.9
1	16	57.5
1	16	47.2
1	16	52.5
1	16	51.5
1	16	51.2
1	16	39.5
1	16	41.6
1	16	41.2
1	16	46.7
1	16	54.3
2	16	46
2	16	29.8
2	16	36.4
2	16	32.7
2	16	37.3
2	16	34.5
2	16	35.4
2	16	38.7
2	16	47.9
2	16	43.5
2	16	45
2	16	38.5
2	16	41.5
2	16	40.8
2	16	45
2	16	48.6
2	16	42.8
2	16	39.8
2	16	40.6
2	16	39
3	16	32.2
3	16	25.9
3	16	26.2
3	16	33.7
3	16	28.4
3	16	39.8
3	16	27.1
3	16	34.5
3	16	35.3
3	16	40.4
3	16	32.8
3	16	40.6
3	16	41
3	16	34.4
3	16	37.9
3	16	41.8
3	16	42.3
3	16	42.6
3	16	38.5
3	16	35.5
4	16	35.4
4	16	24.5
4	16	29.3
4	16	31
4	16	33.4
4	16	33.5
4	16	27.1
4	16	28
4	16	30.8
4	16	30.1
4	16	26.2
4	16	43.6
4	16	34
4	16	35
4	16	28
4	16	41.7
4	16	38.6
4	16	42
4	16	41.8
4	16	34
1	26	55.2
1	26	48.2
1	26	47
1	26	44.2
1	26	38.3
1	26	47.2
1	26	52.1
1	26	52.4
1	26	51.7
1	26	47.9
1	26	52.8
1	26	37.7
1	26	48.5
1	26	42.8
1	26	48.4
1	26	63
1	26	43.8
1	26	50.9
1	26	53.1
1	26	51.2
2	26	32.4
2	26	24.3
2	26	33.9
2	26	29.1
2	26	33
2	26	36.9
2	26	29.5
2	26	31.8
2	26	37.8
2	26	37.6
2	26	37.6
2	26	35.4
2	26	41.2
2	26	39.2
2	26	40.6
2	26	51
2	26	43.1
2	26	41.9
2	26	39.6
2	26	48.3
3	26	33.4
3	26	26
3	26	33.8
3	26	29.1
3	26	30.8
3	26	32.2
3	26	30.9
3	26	36.5
3	26	32.5
3	26	39.9
3	26	40.3
3	26	32.8
3	26	30.6
3	26	29.7
3	26	30
3	26	28.6
3	26	31.8
3	26	46.6
3	26	31.2
3	26	41.5
4	26	33.1
4	26	22.4
4	26	35.8
4	26	29.9
4	26	28.3
4	26	28.7
4	26	28.1
4	26	23.5
4	26	29
4	26	30.8
4	26	36.5
4	26	38
4	26	39.7
4	26	32.7
4	26	36.3
4	26	37.9
4	26	35.1
4	26	39.8
4	26	42.1
4	26	35.4
1	36	35
1	36	35.2
1	36	38.5
1	36	42.7
1	36	40.5
1	36	47.9
1	36	55.2
1	36	44.5
1	36	43.1
1	36	35.8
1	36	43.9
1	36	44.5
1	36	41.1
1	36	53.3
1	36	39.5
1	36	43.1
1	36	52.1
1	36	46.5
1	36	47.1
1	36	45.8
2	36	31
2	36	30.3
2	36	29.4
2	36	30.7
2	36	23.5
2	36	28.6
2	36	26.6
2	36	26.6
2	36	34.7
2	36	36.3
2	36	36.1
2	36	35.3
2	36	35.7
2	36	48.2
2	36	44.3
2	36	30.3
2	36	35.4
2	36	31.8
2	36	31.3
2	36	35
3	36	24.5
3	36	26.3
3	36	26
3	36	25.1
3	36	24.2
3	36	30.5
3	36	23
3	36	35.8
3	36	32.4
3	36	37.9
3	36	29.3
3	36	31.4
3	36	22.2
3	36	28.4
3	36	36.3
3	36	30.7
3	36	20.4
3	36	39.9
3	36	24
3	36	37.2
4	36	25
4	36	34.2
4	36	43.3
4	36	23.1
4	36	29.2
4	36	22.8
4	36	26.6
4	36	29.7
4	36	24.6
4	36	21.3
4	36	27
4	36	44.5
4	36	30.7
4	36	37.1
4	36	29
4	36	38.8
4	36	31.4
4	36	23.3
4	36	35.9
4	36	30.3
1	46	32.2
1	46	37.5
1	46	46.8
1	46	44.1
1	46	34
1	46	47.1
1	46	51.9
1	46	42.6
1	46	49.8
1	46	42
1	46	45.6
1	46	52.4
1	46	47.8
1	46	49.2
1	46	48.4
1	46	50.7
1	46	46.7
1	46	43.6
1	46	49
1	46	50.6
2	46	26.4
2	46	25.1
2	46	31
2	46	23.8
2	46	21.6
2	46	15.3
2	46	25.8
2	46	32.4
2	46	28.6
2	46	28.5
2	46	30.8
2	46	31.6
2	46	32.3
2	46	33.2
2	46	43.6
2	46	40.4
2	46	39.5
2	46	27.6
2	46	37.6
2	46	29.9
3	46	27.4
3	46	22.1
3	46	28.1
3	46	21.4
3	46	25.3
3	46	25
3	46	33
3	46	37.2
3	46	33.7
3	46	35.5
3	46	34
3	46	34.8
3	46	28.2
3	46	27.4
3	46	20.8
3	46	30.3
3	46	34.1
3	46	31.1
3	46	33
3	46	41.1
4	46	27.9
4	46	31.3
4	46	28.3
4	46	29.2
4	46	24.2
4	46	27.2
4	46	23.1
4	46	23.2
4	46	17.2
4	46	18.7
4	46	30.1
4	46	41.2
4	46	33.9
4	46	32
4	46	36.5
4	46	23.9
4	46	30.5
4	46	30.6
4	46	22.2
4	46	27.7

## Sheet: Neck Angulation - Restoration
LOUPE	TOOTH	ANGULATION
1	16	81
1	16	54.8
1	16	49.3
1	16	70.2
1	16	56.5
1	16	47.3
1	16	54.4
1	16	56.7
1	16	61.9
1	16	55.4
1	16	60.4
1	16	53.9
1	16	45.8
1	16	51.7
1	16	60.8
1	16	53.6
1	16	57.8
1	16	53.6
1	16	49.1
1	16	46.9
2	16	29
2	16	46.2
2	16	38.4
2	16	41.4
2	16	28.7
2	16	34
2	16	36.9
2	16	31.7
2	16	41
2	16	30.3
2	16	42.8
2	16	31.5
2	16	36.6
2	16	33.9
2	16	39.8
2	16	44.5
2	16	39.9
2	16	40.8
2	16	39.2
2	16	37.5
3	16	32.3
3	16	43
3	16	43.2
3	16	33.7
3	16	37.6
3	16	39.3
3	16	26.8
3	16	34.3
3	16	38.5
3	16	43.4
3	16	40.8
3	16	32.5
3	16	31.5
3	16	46.5
3	16	31
3	16	42.7
3	16	35.8
3	16	39.1
3	16	36
3	16	35.4
4	16	29.7
4	16	35.9
4	16	31.4
4	16	31.8
4	16	31.1
4	16	36.4
4	16	41.6
4	16	43.5
4	16	49
4	16	38.8
4	16	40
4	16	40.9
4	16	42.3
4	16	41
4	16	39.9
4	16	39.9
4	16	36.3
4	16	44.1
4	16	42.8
4	16	36.9
1	26	66.5
1	26	60
1	26	62.4
1	26	45.3
1	26	54.6
1	26	56.5
1	26	55.6
1	26	55.2
1	26	53.3
1	26	57.6
1	26	56.5
1	26	44.5
1	26	51
1	26	49.9
1	26	61.1
1	26	53.2
1	26	59.3
1	26	57.7
1	26	60.5
1	26	47.8
2	26	39.8
2	26	35.8
2	26	30.7
2	26	41.3
2	26	42.3
2	26	38.3
2	26	36.3
2	26	29.3
2	26	40.8
2	26	43.5
2	26	40.3
2	26	34.3
2	26	39.8
2	26	45
2	26	46.1
2	26	37.2
2	26	40.5
2	26	36.8
2	26	35.2
2	26	49
3	26	41.3
3	26	38.6
3	26	40.5
3	26	43.8
3	26	29.5
3	26	30.8
3	26	35.3
3	26	34.5
3	26	32.9
3	26	35.7
3	26	36.3
3	26	45.5
3	26	45
3	26	34.7
3	26	39.4
3	26	41.3
3	26	34.5
3	26	30.7
3	26	38.7
3	26	42.1
4	26	27.7
4	26	37.7
4	26	36.1
4	26	38
4	26	35.3
4	26	40.5
4	26	47.5
4	26	37.6
4	26	36.2
4	26	43
4	26	41.3
4	26	39
4	26	41
4	26	41.1
4	26	43.9
4	26	46.3
4	26	49.4
4	26	44.2
4	26	30.7
4	26	41.9
1	36	48.8
1	36	45.2
1	36	61
1	36	57.4
1	36	50
1	36	41.7
1	36	36.1
1	36	45.5
1	36	38.9
1	36	44.7
1	36	42.1
1	36	41.2
1	36	29.6
1	36	28.8
1	36	36.7
1	36	32.6
1	36	42.3
1	36	45.4
1	36	32.2
1	36	24.3
2	36	26.3
2	36	24.8
2	36	20.6
2	36	34.5
2	36	31.3
2	36	17
2	36	24.7
2	36	25
2	36	22.9
2	36	27.8
2	36	36.5
2	36	32.3
2	36	29.4
2	36	27.7
2	36	25
2	36	22.8
2	36	27.1
2	36	25.8
2	36	25.9
2	36	33.5
3	36	26.7
3	36	30.3
3	36	28.6
3	36	27.7
3	36	25.6
3	36	31.3
3	36	22.8
3	36	27.5
3	36	22.8
3	36	21.3
3	36	32.9
3	36	23.4
3	36	31
3	36	31.2
3	36	29.7
3	36	29.1
3	36	22.8
3	36	24.6
3	36	25.9
3	36	27
4	36	30
4	36	24.6
4	36	22.2
4	36	37.5
4	36	15.2
4	36	16
4	36	25.7
4	36	25.8
4	36	34.4
4	36	32.9
4	36	31.1
4	36	36.6
4	36	33
4	36	30.6
4	36	28.7
4	36	30.7
4	36	25.9
4	36	28.1
4	36	29.3
4	36	21.5
1	46	49
1	46	49
1	46	52.1
1	46	53.2
1	46	46.9
1	46	33.7
1	46	41.8
1	46	38.9
1	46	28.9
1	46	47.5
1	46	39.3
1	46	41.5
1	46	27.3
1	46	35.7
1	46	39.8
1	46	29.5
1	46	39.3
1	46	49.3
1	46	29.3
1	46	37.1
2	46	30.9
2	46	26.3
2	46	26.1
2	46	29.7
2	46	25.1
2	46	22
2	46	20.2
2	46	23
2	46	20
2	46	24.2
2	46	30.2
2	46	29.2
2	46	33
2	46	31.4
2	46	32.9
2	46	26.8
2	46	26.4
2	46	23.3
2	46	32.8
2	46	30.8
3	46	45.3
3	46	29.7
3	46	26.4
3	46	24.6
3	46	25.2
3	46	30.1
3	46	32.2
3	46	29.3
3	46	27.4
3	46	28.7
3	46	29.5
3	46	32
3	46	27.4
3	46	26.6
3	46	22.6
3	46	22.3
3	46	22.4
3	46	18.6
3	46	23
3	46	24
4	46	25.4
4	46	21.8
4	46	33.9
4	46	24.5
4	46	19.5
4	46	21.3
4	46	29
4	46	23.7
4	46	34.5
4	46	24.7
4	46	28.3
4	46	22.8
4	46	30.7
4	46	26
4	46	26
4	46	18.9
4	46	27.5
4	46	27.2
4	46	22.6
4	46	30.5

## Sheet: Posture - Cavity Preparation
LOUPE	TOOTH	SCORE
1	16	9
1	16	8
1	16	8.5
1	16	8.5
1	16	8.5
1	16	8.5
1	16	8.5
1	16	8.5
1	16	8.5
1	16	8.5
1	16	8.5
1	16	8.5
1	16	8.5
1	16	8.5
1	16	8.5
1	16	8
1	16	8
1	16	8
1	16	8
1	16	8.5
2	16	10
2	16	10
2	16	10
2	16	10
2	16	10
2	16	10
2	16	10
2	16	10
2	16	10
2	16	10
2	16	10
2	16	9.5
2	16	8.5
2	16	9.5
2	16	9.5
2	16	9
2	16	9.5
2	16	9.5
2	16	9
2	16	9.5
3	16	10
3	16	10
3	16	10
3	16	10
3	16	10
3	16	10
3	16	10
3	16	10
3	16	10
3	16	10
3	16	10
3	16	10
3	16	10
3	16	10
3	16	10
3	16	10
3	16	10
3	16	9.5
3	16	10
3	16	10
4	16	10
4	16	10
4	16	10
4	16	10
4	16	10
4	16	10
4	16	10
4	16	10
4	16	10
4	16	10
4	16	10
4	16	10
4	16	10
4	16	10
4	16	10
4	16	10
4	16	10
4	16	10
4	16	10
4	16	10
1	26	9
1	26	8.5
1	26	8.5
1	26	8.5
1	26	8.5
1	26	8.5
1	26	8.5
1	26	9.5
1	26	8.5
1	26	8.5
1	26	8.5
1	26	8.5
1	26	8.5
1	26	8.5
1	26	8.5
1	26	8.5
1	26	9.5
1	26	8.5
1	26	8.5
1	26	8.5
2	26	10
2	26	10
2	26	10
2	26	10
2	26	10
2	26	10
2	26	10
2	26	10
2	26	10
2	26	10
2	26	10
2	26	10
2	26	10
2	26	8.5
2	26	10
2	26	9.5
2	26	9
2	26	9.5
2	26	9.5
2	26	9.5
3	26	10
3	26	10
3	26	10
3	26	10
3	26	10
3	26	10
3	26	10
3	26	10
3	26	10
3	26	10
3	26	10
3	26	10
3	26	10
3	26	10
3	26	10
3	26	10
3	26	9.5
3	26	9.5
3	26	10
3	26	10
4	26	10
4	26	10
4	26	10
4	26	10
4	26	10
4	26	10
4	26	10
4	26	10
4	26	10
4	26	10
4	26	10
4	26	10
4	26	10
4	26	10
4	26	10
4	26	10
4	26	10
4	26	9.5
4	26	10
4	26	10
1	36	8.5
1	36	8.5
1	36	8.5
1	36	8.5
1	36	8.5
1	36	8.5
1	36	8.5
1	36	8.5
1	36	8.5
1	36	8.5
1	36	8.5
1	36	8.5
1	36	8.5
1	36	8.5
1	36	9.5
1	36	8.5
1	36	8.5
1	36	8.5
1	36	8.5
1	36	8.5
2	36	9.5
2	36	8.5
2	36	9.5
2	36	9.5
2	36	9.5
2	36	9.5
2	36	9.5
2	36	9.5
2	36	9.5
2	36	9.5
2	36	9.5
2	36	9.5
2	36	8.5
2	36	9
2	36	8.5
2	36	9.5
2	36	9.5
2	36	9.5
2	36	9.5
2	36	9.5
3	36	9.5
3	36	9.5
3	36	10
3	36	9.5
3	36	9.5
3	36	9.5
3	36	9.5
3	36	9.5
3	36	9.5
3	36	9.5
3	36	9.5
3	36	8.5
3	36	9.5
3	36	9.5
3	36	9.5
3	36	9.5
3	36	9.5
3	36	9.5
3	36	9.5
3	36	9.5
4	36	9.5
4	36	10
4	36	9.5
4	36	8.5
4	36	9.5
4	36	9.5
4	36	9.5
4	36	9.5
4	36	9.5
4	36	9.5
4	36	9.5
4	36	9.5
4	36	9.5
4	36	9.5
4	36	9.5
4	36	9.5
4	36	9.5
4	36	9.5
4	36	9.5
4	36	9.5
1	46	8.5
1	46	8.5
1	46	8.5
1	46	8.5
1	46	8.5
1	46	8.5
1	46	8.5
1	46	8.5
1	46	8.5
1	46	8.5
1	46	8.5
1	46	8.5
1	46	8.5
1	46	9.5
1	46	8.5
1	46	8
1	46	8
1	46	8
1	46	8.5
1	46	8
2	46	8.5
2	46	9.5
2	46	9.5
2	46	8.5
2	46	8.5
2	46	9.5
2	46	9.5
2	46	9.5
2	46	9.5
2	46	9.5
2	46	8.5
2	46	8.5
2	46	9
2	46	8.5
2	46	9
2	46	8
2	46	9.5
2	46	9
2	46	9
2	46	9
3	46	9.5
3	46	9.5
3	46	10
3	46	9.5
3	46	9.5
3	46	9.5
3	46	9.5
3	46	9
3	46	9.5
3	46	9.5
3	46	9.5
3	46	9.5
3	46	9.5
3	46	9.5
3	46	9.5
3	46	9
3	46	9.5
3	46	9.5
3	46	9.5
3	46	9
4	46	10
4	46	9.5
4	46	9.5
4	46	9.5
4	46	9.5
4	46	9.5
4	46	9.5
4	46	9.5
4	46	9.5
4	46	9.5
4	46	9.5
4	46	9.5
4	46	9.5
4	46	9.5
4	46	8.5
4	46	9
4	46	9.5
4	46	9.5
4	46	9.5
4	46	9

## Sheet: Posture - Restoration
LOUPE	TOOTH	SCORE
1	16	8.5
1	16	8
1	16	8.5
1	16	8.5
1	16	8
1	16	8.5
1	16	8.5
1	16	8.5
1	16	8.5
1	16	8.5
1	16	8.5
1	16	8.5
1	16	8.5
1	16	8.5
1	16	8.5
1	16	8.5
1	16	8.5
1	16	8.5
1	16	8.5
1	16	8.5
2	16	9.5
2	16	9.5
2	16	9.5
2	16	10
2	16	10
2	16	9.5
2	16	10
2	16	10
2	16	10
2	16	9.5
2	16	9.5
2	16	9.5
2	16	10
2	16	10
2	16	10
2	16	10
2	16	10
2	16	10
2	16	10
2	16	10
3	16	9.5
3	16	10
3	16	10
3	16	10
3	16	10
3	16	9.5
3	16	9.5
3	16	9.5
3	16	10
3	16	10
3	16	10
3	16	10
3	16	10
3	16	10
3	16	10
3	16	10
3	16	10
3	16	10
3	16	9.5
3	16	9.5
4	16	10
4	16	10
4	16	9
4	16	9.5
4	16	9.5
4	16	10
4	16	10
4	16	10
4	16	10
4	16	10
4	16	10
4	16	10
4	16	10
4	16	10
4	16	9.5
4	16	9.5
4	16	10
4	16	10
4	16	10
4	16	10
1	26	9
1	26	8
1	26	8
1	26	8.5
1	26	8.5
1	26	8.5
1	26	8.5
1	26	8.5
1	26	8.5
1	26	8
1	26	8.5
1	26	8.5
1	26	8.5
1	26	8.5
1	26	8.5
1	26	8.5
1	26	8.5
1	26	8.5
1	26	8
1	26	8.5
2	26	10
2	26	10
2	26	10
2	26	10
2	26	10
2	26	10
2	26	9.5
2	26	9
2	26	9.5
2	26	10
2	26	10
2	26	10
2	26	10
2	26	10
2	26	10
2	26	10
2	26	10
2	26	9.5
2	26	9.5
2	26	9.5
3	26	10
3	26	9.5
3	26	10
3	26	10
3	26	9.5
3	26	9.5
3	26	10
3	26	10
3	26	10
3	26	10
3	26	10
3	26	10
3	26	9.5
3	26	10
3	26	10
3	26	10
3	26	10
3	26	10
3	26	10
3	26	10
4	26	10
4	26	10
4	26	10
4	26	10
4	26	10
4	26	10
4	26	10
4	26	9.5
4	26	10
4	26	10
4	26	10
4	26	9
4	26	10
4	26	10
4	26	10
4	26	9.5
4	26	10
4	26	10
4	26	10
4	26	10
1	36	8.5
1	36	8.5
1	36	9
1	36	8.5
1	36	8.5
1	36	8.5
1	36	8.5
1	36	8.5
1	36	9
1	36	8.5
1	36	9
1	36	9
1	36	9
1	36	8.5
1	36	8.5
1	36	8.5
1	36	8.5
1	36	8.5
1	36	8.5
1	36	8.5
2	36	9.5
2	36	9
2	36	8.5
2	36	9
2	36	9
2	36	10
2	36	10
2	36	9
2	36	8.5
2	36	9
2	36	9.5
2	36	10
2	36	9.5
2	36	9.5
2	36	9.5
2	36	8.5
2	36	9.5
2	36	9.5
2	36	9.5
2	36	10
3	36	9
3	36	9.5
3	36	10
3	36	10
3	36	9
3	36	9
3	36	9.5
3	36	9.5
3	36	9.5
3	36	10
3	36	10
3	36	10
3	36	9.5
3	36	10
3	36	9.5
3	36	9.5
3	36	10
3	36	9.5
3	36	9.5
3	36	9.5
4	36	9.5
4	36	10
4	36	10
4	36	10
4	36	9.5
4	36	10
4	36	10
4	36	9
4	36	8.5
4	36	9.5
4	36	10
4	36	10
4	36	10
4	36	9.5
4	36	10
4	36	9.5
4	36	9.5
4	36	9.5
4	36	9.5
4	36	9.5
1	46	8.5
1	46	8
1	46	8.5
1	46	8
1	46	8.5
1	46	8.5
1	46	9
1	46	9
1	46	9
1	46	9
1	46	8.5
1	46	8.5
1	46	8.5
1	46	8.5
1	46	8.5
1	46	9
1	46	8.5
1	46	8.5
1	46	8.5
1	46	8.5
2	46	10
2	46	9.5
2	46	10
2	46	9.5
2	46	9
2	46	10
2	46	9.5
2	46	8.5
2	46	8.5
2	46	10
2	46	9.5
2	46	10
2	46	9.5
2	46	9.5
2	46	9
2	46	9.5
2	46	9.5
2	46	10
2	46	9.5
2	46	10
3	46	9.5
3	46	9.5
3	46	10
3	46	10
3	46	9
3	46	10
3	46	10
3	46	9.5
3	46	10
3	46	10
3	46	10
3	46	9.5
3	46	9.5
3	46	10
3	46	9.5
3	46	10
3	46	9.5
3	46	10
3	46	9.5
3	46	9.5
4	46	10
4	46	10
4	46	9.5
4	46	9.5
4	46	9.5
4	46	9.5
4	46	9.5
4	46	9
4	46	9
4	46	10
4	46	8.5
4	46	9.5
4	46	9.5
4	46	9.5
4	46	9.5
4	46	9.5
4	46	9.5
4	46	9.5
4	46	9.5
4	46	9.5

## Sheet: Legend
Legend:
Lupe:	1	unaided visualization
	2	Galilean loupe 2.5x
	3	Galilean loupe 3.0x
	4	Galilean loupe 3.5x
Tooth:	16	right maxillary first molar
	26	left maxillary first molar
	36	left mandibular first molar
	46	right mandibular first molar
